1 **Monoallelic methylation and allele specific expression in a social**  
2 **insect**

3 Zoë N. Lonsdale<sup>1\*</sup> (zl107@leicester.ac.uk), Kate D. Lee<sup>2</sup> (kate.d.lee@gmail.com), Maria  
4 Kyriakidou<sup>1</sup> (maria.kiriakidu@gmail.com), Harindra E. Amarasinghe<sup>1</sup> (heak1@yahoo.co.uk),  
5 Despina Nathanael<sup>1</sup> (dn62@student.le.ac.uk), Eamonn B. Mallon<sup>1</sup> (ebm3@le.ac.uk)

6 **1 Department of Genetics, University of Leicester, Leicester, U.K.**

7 **2 Bioinformatics and Biostatistics Support Hub (B/BASH), University of**  
8 **Leicester, Leicester, U.K.**

9 **\* Corresponding author**

Submitted to BMC Evolutionary Biology

## 10 Abstract

11 **Background:** The social hymenoptera are emerging as models for epigenetics. In mammals and  
12 flowering plants' epigenetics, methylation affects allele specific expression. There is contradictory  
13 evidence for the role of methylation on allele specific expression and monoallelic methylation in  
14 social insects. The aim of this paper is to investigate allele specific expression and monoallelic  
15 methylation in the bumblebee, *Bombus terrestris*.

16 **Results:** We found nineteen genes that were both monoallelically methylated and monoalleli-  
17 cally expressed. A number of these genes are involved in reproduction. Fourteen of these genes  
18 express the hypermethylated allele, while the other five express the hypomethylated allele.

19 We also searched for allele specific expression in twenty-nine published RNA-seq libraries.  
20 We found 555 loci with allele-specific expression.

21 **Conclusions:** Genomic imprinting in mammals often involves monoallelic methylation and  
22 expression. It is tempting to associate our results with genomic imprinting, especially as a  
23 number of the genes discovered are exactly the type predicted by theory to be imprinted. Caution  
24 however should be applied due to the lack of understanding of the functional role of methylation  
25 in gene expression in insects and in the as yet unquantified role of genetic cis effects in insect  
26 allele specific methylation and expression.

27 **Keywords:** methylation, allele specific expression, hymenoptera, genomic imprinting

## 28 Background

29 Epigenetics is the study of heritable changes in gene expression that do not involve changes to  
30 the underlying DNA sequence [1]. Social hymenoptera (ants, bees, and wasps) are important  
31 emerging models for epigenetics [2, 3, 4, 5]. This is due to theoretical predictions for a role for an  
32 epigenetic phenomenon, genomic imprinting, in their social organisation [6], the recent discovery  
33 of parent-of-origin allele specific expression in honeybees [7], and data showing a fundamental  
34 role in social insect biology for DNA methylation, an epigenetic marker [8]. Genomic imprinting  
35 is allele specific expression in diploid individuals, where expression is dependent on the sex of  
36 the parent from which an allele was inherited [9]. In mammals and flowering plants, genomic  
37 imprinting is often associated with methylation marks passed from parents to offspring [10].

38 However the presence of allele specific expression and methylation does not necessarily mean  
39 an epigenetic process is involved. Allele specific expression, and DNA methylation, can be due  
40 to processes other than genomic imprinting. Allele specific expression is known to be caused by  
41 a number of genetic as well as epigenetic processes [11]. The genetic process usually involves cis  
42 effects such as transcription factor binding sites, or less often, untranslated regions which alter  
43 RNA stability or microRNA binding [12]. As well as genomic imprinting, DNA methylation is  
44 also involved in cellular differentiation [13]. Allele specific methylation can also be affected by  
45 the allele's genotype as well as epigenetics [14].

46 There is contradictory evidence for the role of methylation on allele specific expression and  
47 monoallelic methylation in social insects. Methylation is associated with allele specific expression  
48 in a number of loci in the ants *Camponotus floridanus* and *Harpegnathos saltator* [15]. Recently,  
49 we found evidence for allele specific expression in bumblebee worker reproduction genes [16]  
50 and that methylation is important in bumblebee worker reproduction [17]. However, other work  
51 on the honeybee *Apis mellifera* found no link between potentially imprinted loci and known  
52 methylation sites in that species [18].

53 The aim of this paper is to investigate allele specific expression and monoallelic methylation  
54 in the bumblebee, *Bombus terrestris*. The recently sequenced genome of the bumblebee, *Bom-*

55 *bus terrestris* displays a full complement of genes involved in the methylation system [19]. An  
56 extreme form of imprinting involves monoallelic expression (one allele is completely silenced).  
57 In the canonical mammal and flowering plant systems, this is often associated with monoal-  
58 lelic methylation. In this paper, we examined the link between monoallelic methylation and  
59 monoallelic expression in the bumblebee, *Bombus terrestris*, by examining two whole methy-  
60 lome libraries and an RNA-seq library from the same bee. MeDIP-seq is an immunoprecipitation  
61 technique that creates libraries enriched for methylated cytosines [20]. Methyl-sensitive restric-  
62 tion enzymes can create libraries that are enriched for non-methylated cytosines (MRE-seq)  
63 [20]. Genes found in both libraries are monoallelically methylated, with the hypermethylated  
64 allele being in the MeDIP-seq data and the hypomethylated allele in the MRE-seq data [20].  
65 Monoallelic expression was identified in these loci from the RNA-seq library. If only one allele  
66 was expressed then we knew that these loci were both monoallelically methylated and monoal-  
67 lelically expressed in this bee. We confirmed this monoallelic expression in one locus using  
68 qPCR.

69 We then more generally searched for allele specific expression by analysing twenty nine  
70 published RNA-seq libraries from worker bumblebees [21, 22]. We identified heterozygotes in  
71 the RNA-seq libraries and measured the expression of each allele. We then identified loci that  
72 showed significant expression differences between their two alleles.

## 73 Results

74 In total, we found nineteen genes that were both monoallelically methylated (present in both  
75 Me-DIP and MRE-seq libraries) and monoallelically expressed (only one allele present in the  
76 RNA-seq library), for an example see *Bicaudal-D* in Figure 1. Of the nineteen genes, fourteen  
77 had the hypermethylated (MeDIP) allele expressed, while five had the hypomethylated (MRE-  
78 seq) allele expressed (see supplementary table 1).

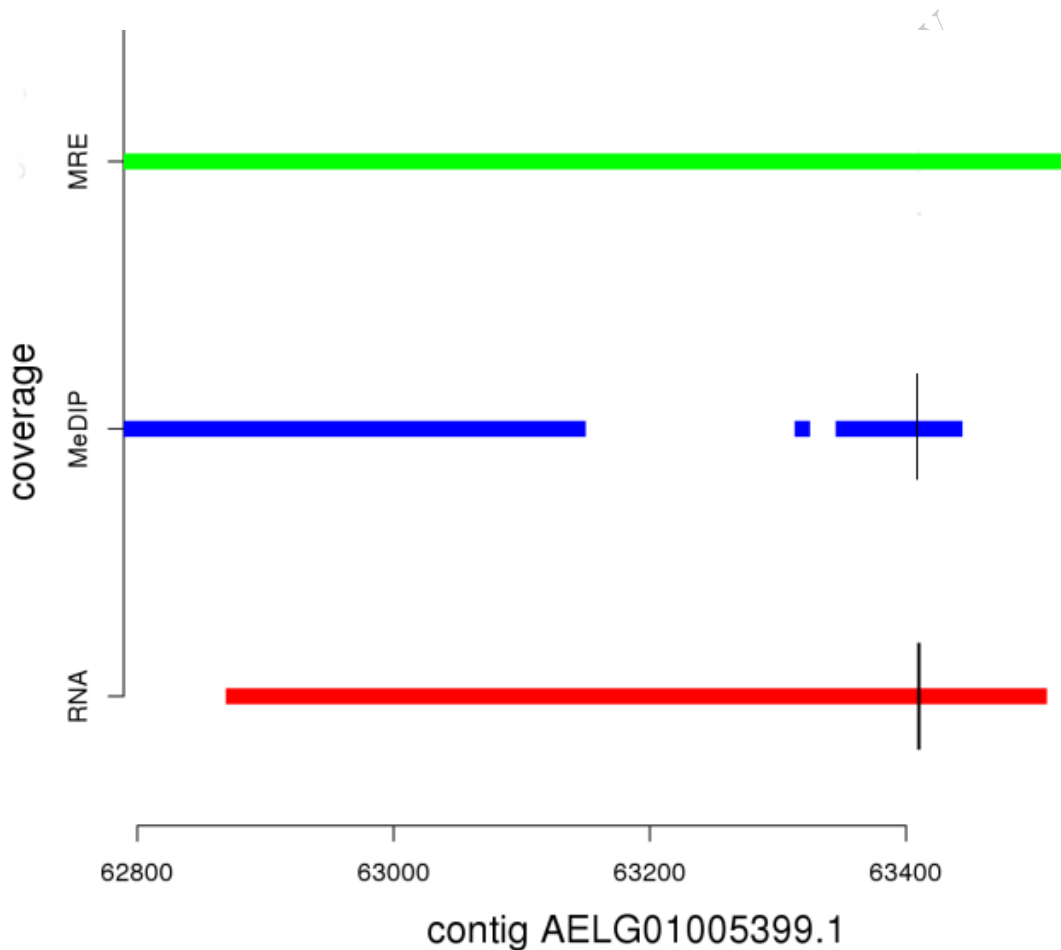

Figure 1: **Coverage of three libraries for bicaudal d.** Horizontal lines represent available reads for each library over this genomic range (x-axis). The vertical line shows the position of the snp and which genomic library shares the same allele.

79 Monoallelic expression was confirmed in one of these nineteen (*slit homolog 2 protein-like*

80 (AELG01000623.1)) by allele specific qPCR [16]. The allele with a guanine at the snp position  
81 had a mean expression of  $6.04 \pm 8.28$  (standard deviation) in four bees from three different  
82 colonies. The thymine allele was not expressed at all in these bees. This was not due to the  
83 efficiency of the primers as the DNA controls of both alleles showed similar amplification (G  
84 mean =  $422.70 \pm 507.36$ , T mean =  $1575.17 \pm 503.02$ ). In the three other loci tested (*Ras*  
85 *GTPase-activating protein 1*, *Ecdysone receptor*, *methionine aminopeptidase 1-like*) we found  
86 apparent monoallelic expression, but could not dismiss primer efficiency as the cause.

87 The nineteen genes were blasted against the nr/nt database (blastn). Four returned no hits  
88 and a further four returned noninformative hits. A number of these genes had homologs known  
89 to be methylated in other animals (Table 1). Six of the eleven genes with informative hits have  
90 functions to do with social organisation in the social insects (Table 1).

91 We then looked at these nineteen genes in twenty-nine previously published RNA-seq li-  
92 braries. Fifteen of these nineteen genes expressed a single allele in all twenty nine RNA-seq li-  
93 braries, see supplementary table 2. The remaining four genes (AELG01000620.1, AELG01001021.1,  
94 AELG01002224.1a, AELG01002224.1b) were inconsistent; they showed expression of one allele  
95 in some *B. terrestris* workers, and expression of two alleles in other workers.

96 We then searched more generally for allele specific expression in the twenty-nine RNA-seq  
97 libraries. 555 loci showed allele-specific expression in  $\geq 3$  of the 29 RNA-seq libraries (supple-  
98 mentary table 3). Blasting (Blastn) these loci against *Bombus terrestris* returned 211 hits. To  
99 search for gene ontology terms, we blasted (blastx) against *Drosophila melanogaster*, which re-  
100 turned 329 hits. One hundred and fifty-one Gene Ontology(GO) terms were enriched in the  
101 555 regions showing allele specific expression (Fishers exact test  $p > 0.05$ ), however none were  
102 significant at the more stringent FDR  $> 0.05$ . Figure 2 shows the large number of biological  
103 functions associated with these 555 genes.

| Gene                                                            | Accession      | Expressed allele | Function                                                                                                                                                                                                                                                                                                                                                  |
|-----------------------------------------------------------------|----------------|------------------|-----------------------------------------------------------------------------------------------------------------------------------------------------------------------------------------------------------------------------------------------------------------------------------------------------------------------------------------------------------|
| <i>yippee-like 1</i>                                            | AELG01001021.1 | MeDIP            | Yippee is an intracellular protein with a zinc-finger like domain. DNA methylation of a CpG island near the <i>yippee-like 3</i> promoter in humans represents a possible epigenetic mechanism leading to decreased gene expression in tumours [23].                                                                                                      |
| <i>slit homolog 2</i>                                           | AELG01000623.1 | MeDIP            | Slit is produced by midline glia in insects and is involved in cell projection during development [24]. All three human Slits were found to be hypermethylated in hepatocellular carcinoma cell lines [25].                                                                                                                                               |
| <i>protein-like methionine aminopeptidase 1-like</i>            | AELG01000544.1 | MeDIP            | Methionine aminopeptidases catalyse N-terminal methionine removal [26]. MAP1D in humans was found to be potentially oncogenic [26].                                                                                                                                                                                                                       |
| <i>calmodulin-lysine N-methyltransferase-like</i>               | AELG01003672.1 | MRE              | Calmodulin-lysine N-methyltransferase catalyses the trimethylation of a lysine residue of calmodulin. Calmodulin is a ubiquitous, calcium-dependent, eukaryotic signalling protein with a large number of interactors. The methylation state of calmodulin causes phenotypic changes in growth and developmental processes [27].                          |
| <i>Ecdysone receptor</i>                                        | AELG01000543.1 | MRE              | In <i>Drosophila melanogaster</i> , ecdysone receptor interacts with ecdysone to activate a series of ecdysteroid genes [28]. In honeybees, <i>Ecdysone receptor</i> is expressed in the brain mushroom bodies of both workers and queens and ovaries of queens [28].                                                                                     |
| <i>Shaker</i>                                                   | AELG01001021.1 | MeDIP            | Shaker is involved in the operation of potassium ion channel. <i>Shaker</i> expression was upregulated in sterile versus reproductive honeybee workers [29].                                                                                                                                                                                              |
| <i>excitatory amino acid transporter 4-like</i>                 | AELG01000969.1 | MRE              | Excitatory amino acid transporters are neurotransmitter transporters. <i>Excitatory amino acid transporter 3</i> expression was upregulated in sterile honeybee workers [29]. <i>Excitatory amino acid transporter 1</i> expression differences were also associated with worker - queen differentiation in the paper wasp <i>Polistes metricus</i> [30]. |
| <i>elongation of very long chain fatty acids protein 6-like</i> | AELG01004467.1 | MeDIP            | The timing of the upregulation of fatty acid metabolism was found to be different in queen and worker honeybees [31].                                                                                                                                                                                                                                     |
| <i>ras GTPase-activating protein nGAP-like</i>                  | AELG01004618.1 | MeDIP            | <i>Ras GTPase-activating protein 1</i> was found to be upregulated in reproductive honeybee workers [29]. It is involved in oocyte meiosis.                                                                                                                                                                                                               |
| <i>bicaudal D-related protein homolog</i>                       | AELG01005399.1 | MeDIP            | Bicaudal is involved in embryonic pattern formation in <i>Drosophila</i> [32]. It is thought to be involved in the differentiation between soldiers and workers in the termite <i>Reticulitermes flavipes</i> [33]. <i>Bicaudal protein D</i> has been shown to be methylated more in eggs than sperm in honeybees [34].                                  |

Table 1: The eleven of the nineteen monoallelically methylated and expressed genes that returned informative blast hits.

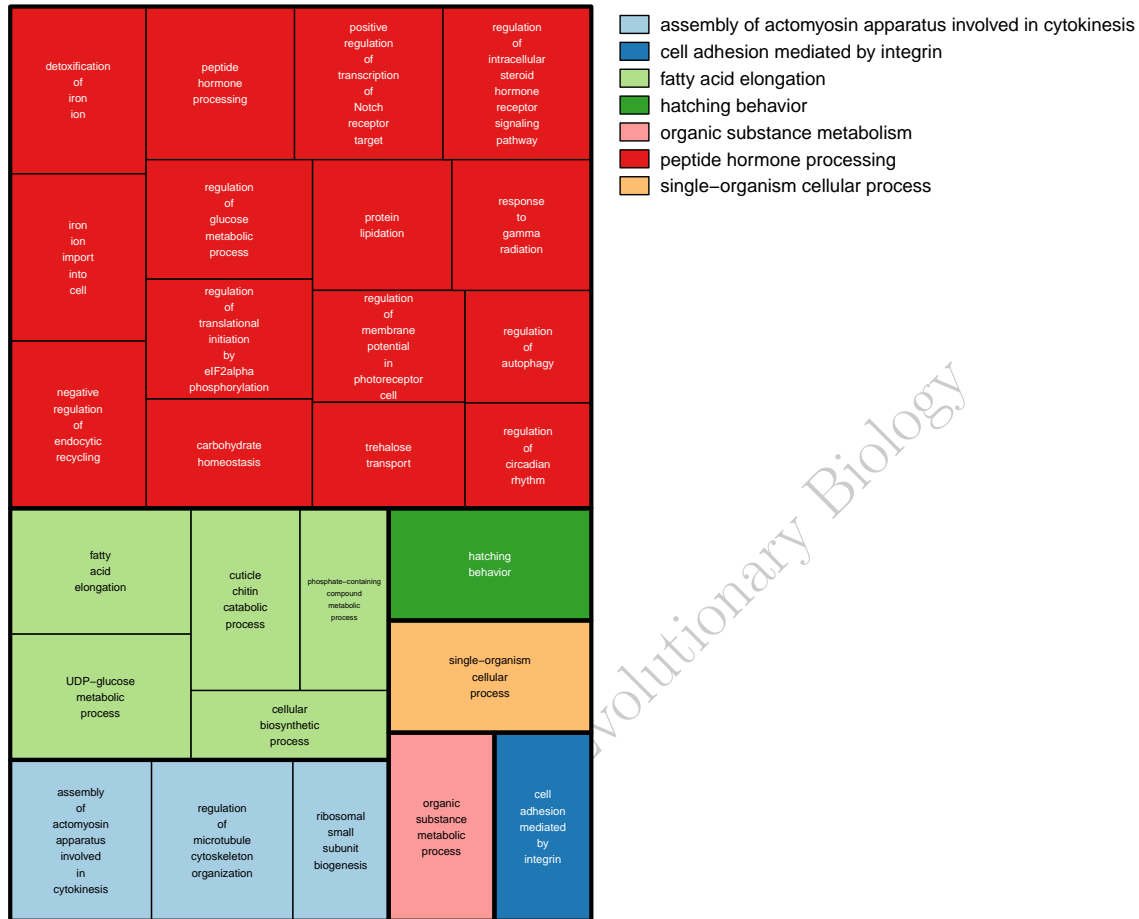

Figure 2: **GO terms associated with allele specific expression.** A summary of the enriched GO terms ( $p < 0.05$ , based on Blast2Go annotation) found for genes displaying allele specific expression. This figure was produced using Revigo

## 104 Discussion

105 Of the nineteen genes displaying monoallelic methylation and monoallelic expression, fourteen  
 106 had the hypermethylated (MeDIP) allele expressed, while five had the hypomethylated (MRE-  
 107 seq) allele expressed (see supplementary table 1). In ant genes with allele specific methylation,  
 108 the hypermethylated allele showed more expression than the hypomethylated allele [15]. This fits  
 109 with genome wide analysis that shows exonic methylation in insects associated with increased  
 110 gene expression [35, 36]. Our fourteen genes with the hypermethylated allele expressed agree



111 with this pattern. But how to explain the five genes where the hypomethylated allele was  
112 expressed? Firstly, the role of methylation in insect gene expression is not clear cut, with the  
113 relationship between exonic methylation and expression often disappearing at the gene level [36].  
114 Secondly, even in the canonical mammalian methylation system, the "wrong" allele has been  
115 shown to be expressed occasionally due to lineage specific effects [37, 38, 39, 40, 41].

116 We then looked at the expression of these nineteen genes in all twenty-nine RNA-seq libraries.  
117 If they are monoallelically expressed in these bees, we would find only one allele in a given  
118 RNA-seq library. Fifteen of these nineteen genes were confirmed to show a single allele in all  
119 twenty-nine RNA-seq libraries. We would also find only one allele if that bee was homozygous.  
120 We can not rule out that these fifteen genes just happen to be homozygous in all twenty-nine  
121 bees from five different colonies from multiple sources, although this seems unlikely. This result  
122 suggests that the finding in the monoallelic analysis can be generalized.

123 The remaining four genes showed inconsistent expression with one allele being expressed in  
124 some *B. terrestris* workers, and expression of two alleles in other workers. Natural intraspecific  
125 variation in imprinting has been found in other species [42]. Another explanation is that these  
126 loci are not imprinted but rather their allele specific expression is derived from genetic effects  
127 [43].

128 There are three main genetic, as opposed to epigenetic, effectors of allele specific expression  
129 [44]. Allele specific expression can be caused by differences in the alleles' sequence within the  
130 translated part resulting in a modified protein. A change at the alleles' cis regulatory sites, could  
131 cause differential binding of transcription factors. Transcript processing can be affected by a  
132 change in the alleles' sequence a splice site or untranslated region. This large number of possible  
133 causes of allele specific expression could explain why we see so many functions associated with  
134 the 555 genes showing allele specific expression (Figure 2).

135 But it is not just allele specific expression that may have genetic as well as epigenetic effects.  
136 It has been shown in humans that some allele specific methylation is determined by DNA  
137 sequence in cis and therefore shows Mendelian inheritance patterns [14]. An extreme example

138 of genetically controlled allele specific methylation is found in *Nasonia* wasps, where there is no  
139 evidence for methylation driven genomic imprinting, but inheritable cis-mediated allele specific  
140 methylation has been found [45]. This cis-mediated methylation has recently been suggested as  
141 being important in social insect biology [43, 46].

142 We have found that allele specific expression is widespread in the bumblebee. We have also  
143 found that the extreme version of allele specific expression, monoallelic expression is associated  
144 with monoallelic methylation. Genomic imprinting in mammals usually involves monoallelic  
145 methylation and expression. It is tempting to associate our results with genomic imprinting,  
146 especially as a number of the genes discovered are exactly the type predicted by theory to  
147 be imprinted [6]. Caution however should be applied due to the lack of understanding of the  
148 functional role of methylation in gene expression in insects and in the as yet unquantified role  
149 of genetic cis effects in insect allele specific methylation and expression.

Submitted to BMC Evolutionary Biology

## 150 Materials and Methods

### 151 Samples

152 Data from twenty-nine RNA-seq libraries were used for the allele specific expression analysis  
153 (six from Harrison *et al.* [21], and twenty-three from Riddell *et al.* [22]. The Riddell bees  
154 came from two colonies, one commercially reared bumblebee colony from Koppert Biological  
155 Systems U.K. and one colony from a wild caught queen from the botanic gardens, Leicester.  
156 The Harrison bees were from three commercially reared colonies obtained from Agralan Ltd.  
157 A Koppert colony worker bee was used for the MeDIP-seq / MRE-seq / RNA-seq experiment,  
158 and was from a separate Koppert colony to the bees used for the qPCR analysis. Samples are  
159 outlined in Table 2. Colonies were fed *ad libitum* with pollen (Percie du sert, France) and 50 %  
160 diluted glucose/fructose mix (Meliose Roquette, France). Before and during the experiments  
161 colonies were kept at 26°C and 60% humidity in constant red light.

Table 2: **Bees used in each experiment.** K refers to Koppert, A to Agralan and Q to the wild caught Leicester queen.

| Experiment                            | Number | Colony |
|---------------------------------------|--------|--------|
| Allele specific expression<br>RNA-seq | 1      | A1     |
|                                       | 2      | A2     |
|                                       | 2      | A3     |
|                                       | 1      | K1     |
|                                       | 14     | K2     |
|                                       | 9      | Q1     |
| MeDip/MRE/RNA-seq                     | 1      | K1     |
| qPCR                                  | 2      | K3     |
|                                       | 1      | K4     |
|                                       | 1      | K5     |

162 **Next generation sequencing**

163 **MeDIP-seq, MRE-seq and RNA-seq**

164 RNA and DNA was extracted from a single five day old whole bee (Colony K2). DNA was  
165 extracted using an ethanol precipitation method. Total RNA was extracted using Tri-reagent  
166 (Sigma-Aldrich, UK).

167 Three libraries were prepared from this bee by Eurofins genomics. These were MeDIP-seq  
168 and MRE-seq libraries on the DNA sample and one amplified short insert cDNA library with  
169 size of 150-400 bp using RNA. Both the MeDIP-seq and MRE-seq library preparations are  
170 based on previously published protocols [20]. MeDIP-seq uses monoclonal antibodies against 5-  
171 methylcytosine to enrich for methylated DNA independent of DNA sequence. MRE-seq enriches  
172 for unmethylated cytosines by using methylation-sensitive enzymes that cut only restriction sites  
173 with unmethylated CpGs. Each library was individually indexed. Sequencing was performed on  
174 an Illumina HiSeq2000 instrument (Illumina, Inc.) by the manufacturers protocol. Multiplexed  
175 100 base paired-read runs were carried out yielding 9390 Mbp for the MeDIP-seq library, 11597  
176 Mbp for the MRE-seq library and 8638 Mbp for the RNA-seq library.

177 **Previously published RNA-seq**

178 Full details of the RNA-seq protocols used have been published previously [21, 22]. Briefly, for  
179 the Riddell bees, total RNA was extracted from twenty three individual homogenised abdomens  
180 using Tri-reagent (Sigma-Aldrich, UK). TruSeq RNA-seq libraries were made from the 23 sam-  
181 ples at NBAF Edinburgh. Multiplexed 50 base single-read runs was performed on an Illumina  
182 HiSeq2000 instrument (Illumina, Inc.) by the manufacturers protocol. For the Harrison bees,  
183 total RNA was extracted from whole bodies using a GenElute Mammalian Total RNA Miniprep  
184 kit (Sigma-Aldrich) following the manufacturers' protocol. The six libraries were sequenced as  
185 multiplexed 50 base single-read runs on an Illumina HiSeq 2500 system in rapid mode at the  
186 Edinburgh Genomics facility of the University of Edinburgh.

## 187 **Monoallelic methylation and expression - Bioinformatic analysis**

188 We searched for genes that were monoallelically methylated (present in both methylation li-  
189 braries), heterozygous and monoallelically expressed (only one allele present in the RNA-seq  
190 library).

## 191 **Alignment and bam refinement**

192 mRNA reads were aligned to the *Bombus terrestris* genome assembly (AELG00000000) using  
193 Tophat [47] and converted to bam files with Samtools [48]. Reads were labelled with the AddOr-  
194 ReplaceReadGroups.jar utility in Picard (<http://picard.sourceforge.net/>). The MRE-seq  
195 and MeDIP-seq reads were aligned to the genome using BWA mapper [49]. The resultant sam  
196 alignments were soft-clipped with the CleanSam.jar utility in Picard and converted to bam for-  
197 mat with Samtools. The Picard utility AddOrReplaceReadGroups.jar was used to label the  
198 MRE and MeDIP reads which were then locally re-aligned with GATK [50, 51]. PCR duplicates  
199 for all bams (mRNA, MeDIP and MRE) were marked with the Picard utility Markduplicates.jar.

## 200 **Identifying regions of interest and integrating data**

201 Coverage of each data type was calculated using GATK DepthofCoverage [51]. Only regions  
202 with a read depth of at least six in each of the libraries (RNA-seq, MeDIP-seq and MRE-seq)  
203 was used. Heterozygotes were identified using Samtools mpileup and bcftools on each data set  
204 separately [49] and results were merged with vcf tools [52]. CpG islands were identified using  
205 CpG island searcher [53]. Regions of mRNA with overlaps of MeDIP, MRE, CpG islands and  
206 monoallelic snps were identified with custom perl scripts.

## 207 **Allele specific expression - Bioinformatic analysis**

208 We created a pipeline to search for heterozygous loci that show allele specific expression and  
209 identify the associated enriched gene ontology (GO) terms in twenty-nine previously published  
210 RNA-seq libraries [21, 22].

211 Each RNA library was mapped to the *Bombus terrestris* reference genome (Bter 1.0, accession  
212 AELG00000000.1) [19] using the BWA mapper [49]. The mean GC content of the 29 libraries  
213 was 42.34%, with individual libraries having a similar GC content ranging from 40-46%. GC  
214 content differed with run (Nested ANOVA:  $F = 20.302$ ,  $df = 1$ ,  $p < 0.001$ ), but not by colony  
215 (Nested ANOVA:  $F = 1.763$ ,  $df = 4$ ,  $p = 0.171$ ). The mean coverage of the 29 libraries was  
216 13.29, with mean library coverage ranging from 9.84 to 17.61. Run had an effect on coverage  
217 (Nested ANOVA:  $F = 7.554$ ,  $df = 1$ ,  $p = 0.011$ ), as did colony (Nested ANOVA:  $F = 6.962$ ,  $df$   
218  $= 4$ ,  $p < 0.001$ ).

219 Therefore, the combat method in the R package SVA (version 3.20.0) was used to remove  
220 any batch effects and control for original differences in coverage [54, 55]. The success of this  
221 control was confirmed by the R package edgeR (version 3.14.0) [56, 57]. The SVA adjustment  
222 reduced the edgeR dispersion value from 3.9994 (BCV=2) to 0 (BCV=0.0003) (supplementary  
223 figure 1).

224 Bcftools (version 0.1.19-44428cd), bedtools (version 2.17.0), and samtools (version 0.1.19-  
225 44428cd) were used to prepare the RNA libraries and call the SNPs, before the SNPs were  
226 filtered based on mapping quality score [49, 58]. Only SNPs with a mapping quality score of  $p$   
227  $< 0.05$  and a read depth of  $\geq 6$  were included in the analyses. The R package, QuASAR, was then  
228 used to identify genotypes (according to the Hardy-Weinberg equilibrium) and locate any allele  
229 specific expression at heterozygous sites [59]. QuASAR removes snps with extreme differential  
230 allele expression from the analyses, thus controlling for any base-calling errors. The loci (the  
231 snp position +/- 2900bp) identified as showing ASE in at least three of the thirty libraries, were  
232 blasted (Blastx) against *Drosophila melanogaster* proteins (non-redundant (nr) database) [60].  
233 The blast results were annotated using Blast2Go [61]. Fisher's exact test was implemented to  
234 identify enriched GO terms, which were then visualised using REVIGO [62]. To identify which  
235 bumblebee genes the snps were located in, the snp position +/- 25 bp was blasted (Blastn)  
236 against the *Bombus terrestris* genome [19].

## 237 Candidate gene allele specific qPCR

238 DNA was extracted from four bees from three Koppert colonies using the Qiagen DNA Micro kit  
239 according to manufacturer's instructions. RNA was extracted from samples of the heads of the  
240 same worker bees with the QIAGEN RNeasy Mini Kit according to manufacturer's instructions.  
241 cDNA was synthesized from a 8µl sample of RNA using the Tetro cDNA synthesis Kit (Bioline)  
242 as per manufacturer's instructions.

243 We amplified numerous fragments of the 19 candidate genes. Sanger sequencing results  
244 were analyzed using the heterozygote analysis module in Geneious version 7.3.0 to identify  
245 heterozygotic nucleotide positions. It was difficult to identify snps in exonic regions of the 19  
246 loci, which could be amplified with primers of suitable efficiency. We managed to identify a  
247 suitable region in *slit homolog 2 protein-like* (AELG01000623.1 exonic region 1838-2420).

248 The locus was run for 3 different reactions; T allele, G allele and reference. Reference primers  
249 were designed according to [63]. A common reverse primer (CTGGTCCCGTCCAATCTAA)  
250 was used for all three reactions. A reference forward primer (CGTGTCCAGAATCGACAATG)  
251 was designed to the same target heterozygote sequence, upstream of the heterozygote nucleotide  
252 position. The reference primers measure the total expression of the gene, whereas the allele  
253 specific primers (T allele: CCAGAATCGACAATGACTCGT, G allele: CAGAATCGACAAT-  
254 GACTCGG) measure the amount of expression due to the allele. Thus the ratio between the  
255 allele specific expression and reference locus expression would be the relative expression due to  
256 the allele.

257 Three replicate samples were run for each reaction. All reactions were prepared by the  
258 Corbett robotics machine, in 96 well qPCR plates (Thermo Scientific, UK). The qPCR reaction  
259 mix (20µl) was composed of 1µl of diluted cDNA (50ng/µl), 1µl of forward and reverse primer  
260 (5µM/µl each), 10µl 2X SYBR Green JumpStart Taq ReadyMix (Sigma Aldrich, UK) and 7µl  
261 ddH<sub>2</sub>O. Samples were run in a PTC-200 MJ thermocycler. The qPCR profile was; 4 minutes at  
262 95°C denaturation followed by 40 cycles of 30s at 95°C, 30s at 59°C and 30s at 72°C and a final  
263 extension of 5 minutes at 72°C.

264 Forward primers are different, both in their terminal base (to match the snp) and in their  
265 length. It is entirely possible that they may amplify more or less efficiently even if there was  
266 no difference in amount of template [64]. To test for this we repeated all qPCRs with genomic  
267 DNA (1µl of diluted DNA (20ng/µl) from the same bees as the template. We would expect  
268 equal amounts of each allele in the genomic DNA. We also measured efficiency of each reaction  
269 as per [65].

270 Median  $C_t$  was calculated for each set of three technical replicates. A measure of relative  
271 expression (ratio) was calculated for each allele in each worker bee as follows:

$$ratio_{allele} = \frac{E_{allele}^{-C_{t_{allele}}}}{E_{reference}^{-C_{t_{reference}}}} \quad (1)$$

272 E is the median efficiency of each primer set [64, 65]. All statistical analysis was carried out  
273 using R (3.1.0) [66].

## 274 **Ethical declaration**

275 The protocol reported here conforms to the regulatory requirements for animal experimentation  
276 in the United Kingdom.



## 277 **Data accessibility**

278 All sequence data for this study are archived at European Nucleotide Archive (ENA); Accession  
279 no. PRJEB9366 (<http://www.ebi.ac.uk/ena/data/view/PRJEB9366>), x, x. GO-analysis results  
280 and lists of differentially expressed transcripts are available as Supporting Information.

## 281 **Competing interests**

282 The authors declare they have no competing interests.

## 283 **Author contributions**

284 ZNL analysed the data and wrote the initial draft. KDL analysed the data and was involved  
285 in the redrafting of the manuscript. HEA carried out the experiments and was involved in the  
286 redrafting of the manuscript. DN carried out the experiments and was involved in the redrafting  
287 of the manuscript. MK analysed the data was involved in the redrafting of the manuscript. EBM  
288 designed the project, analysed the data and wrote the initial draft.

## 289 **Acknowledgements**

290 This work was financially supported by NERC grant no. NE/H010408/1 and NE/N010019/1 and  
291 NERC Biomolecular Analysis Facility research grants (NBAF 606 and 829) to EBM. Illumina  
292 library preparation, sequencing and bioinformatics were carried out by Edinburgh Genomics,  
293 The University of Edinburgh. Edinburgh Genomics is partly supported through core grants  
294 from NERC (R8/H10/56), MRC (MR/K001744/1) and BBSRC (BB/J004243/1). ZNL would  
295 like to thank UK BBSRC for its financial support via MIBTP. The funders had no role in study  
296 design, data collection and analysis, decision to publish, or preparation of the manuscript.

## 297 References

- 298 [1] Goldberg, A., Allis, C. & Bernstein, E., 2007 Epigenetics: A Landscape Takes Shape. *Cell*  
299 **128**, 635–638. ISSN 0092-8674. (doi:10.1016/j.cell.2007.02.006).
- 300 [2] Glastad, K. M., Hunt, B. G., Yi, S. V. & Goodisman, M. a. D., 2011 DNA methylation in  
301 insects: on the brink of the epigenomic era. *Insect Molecular Biology* **20**, 553–565. ISSN  
302 1365-2583. (doi:10.1111/j.1365-2583.2011.01092.x).
- 303 [3] Weiner, S. A. & Toth, A. L., 2012 Epigenetics in social insects: a new direction for un-  
304 derstanding the evolution of castes. *Genetics research international* **2012**, 609810. ISSN  
305 2090-3162. (doi:10.1155/2012/609810).
- 306 [4] Welch, M. & Lister, R., 2014 Epigenomics and the control of fate, form and function  
307 in social insects. *Current Opinion in Insect Science* **1**, 31–38. ISSN 2214-5745. (doi:  
308 10.1016/j.cois.2014.04.005).
- 309 [5] Yan, H., Simola, D. F., Bonasio, R., Liebig, J., Berger, S. L. & Reinberg, D., 2014 Eusocial  
310 insects as emerging models for behavioural epigenetics. *Nature Reviews Genetics* **15**, 677–  
311 688. ISSN 1471-0056. (doi:10.1038/nrg3787).
- 312 [6] Queller, D. C., 2003 Theory of genomic imprinting conflict in social insects. *Bmc Evolu-*  
313 *tionary Biology* **3**, art. no.–15.
- 314 [7] Galbraith, D. A., Kocher, S. D., Glenn, T., Albert, I., Hunt, G. J., Strassmann, J. E.,  
315 Queller, D. C. & Grozinger, C. M., 2016 Testing the kinship theory of intragenomic con-  
316 flict in honey bees (*Apis mellifera*). *Proceedings of the National Academy of Sciences* p.  
317 201516636. ISSN 0027-8424, 1091-6490. (doi:10.1073/pnas.1516636113).
- 318 [8] Chittka, A., Wurm, Y. & Chittka, L., 2012 Epigenetics: The making of ant castes. *Current*  
319 *Biology* **22**, R835–R838. ISSN 0960-9822. (doi:10.1016/j.cub.2012.07.045).

- 320 [9] Haig, D., 2000 The kinship theory of genomic imprinting. *Annual Review of Ecology and*  
321 *Systematics* **31**, 9–32.
- 322 [10] Reik, W. & Walter, J., 2001 Genomic imprinting: Parental influence on the genome. *Nature*  
323 *Reviews Genetics* **2**, 21–32. ISSN 1471-0056. 1.
- 324 [11] Palacios, R., Gazave, E., Goi, J., Piedrafita, G., Fernando, O., Navarro, A. & Villoslada,  
325 P., 2009 Allele-Specific Gene Expression Is Widespread Across the Genome and Biological  
326 Processes. *PLoS ONE* **4**, e4150. (doi:10.1371/journal.pone.0004150).
- 327 [12] Farh, K. K.-H., Grimson, A., Jan, C., Lewis, B. P., Johnston, W. K., Lim, L. P., Burge,  
328 C. B. & Bartel, D. P., 2005 The widespread impact of mammalian MicroRNAs on mRNA  
329 repression and evolution. *Science (New York, N.Y.)* **310**, 1817–1821. ISSN 1095-9203.  
330 (doi:10.1126/science.1121158).
- 331 [13] Bird, A., 2002 DNA methylation patterns and epigenetic memory. *Genes & Development*  
332 **16**, 6–21. ISSN 0890-9369, 1549-5477. (doi:10.1101/gad.947102).
- 333 [14] Meaburn, E. L., Schalkwyk, L. C. & Mill, J., 2010 Allele-specific methylation in the human  
334 genome: implications for genetic studies of complex disease. *Epigenetics* **5**, 578–582. ISSN  
335 1559-2308. (doi:10.4161/epi.5.7.12960).
- 336 [15] Bonasio, R., Li, Q., Lian, J., Mutti, N. S., Jin, L., Zhao, H., Zhang, P., Wen, P., Xiang,  
337 H., Ding, Y. *et al.*, 2012 Genome-wide and Caste-Specific DNA Methylomes of the Ants  
338 *Camponotus floridanus* and *Harpegnathos saltator*. *Current Biology* **22**, 1755–1764. ISSN  
339 0960-9822. (doi:10.1016/j.cub.2012.07.042).
- 340 [16] Amarasinghe, H., Toghiani, B., Nathanael, D. & Mallon, E. B., 2015 Allele specific expression  
341 in worker reproduction genes in the bumblebee *Bombus terrestris*. *PeerJ* **3**, e1079. (doi:  
342 <https://dx.doi.org/10.7717/peerj.1079>).

- 343 [17] Amarasinghe, H. E., Clayton, C. I. & Mallon, E. B., 2014 Methylation and worker reproduc-  
344 tion in the bumble-bee (*Bombus terrestris*). *Proceedings of the Royal Society B: Biological*  
345 *Sciences* **281**, 20132502. ISSN 0962-8452, 1471-2954. (doi:10.1098/rspb.2013.2502).
- 346 [18] Kocher, S. D., Tsuruda, J. M., Gibson, J. D., Emore, C. M., Arechavaleta-Velasco, M. E.,  
347 Queller, D. C., Strassmann, J. E., Grozinger, C. M., Gribskov, M. R., San Miguel, P. *et al.*,  
348 2015 A Search for Parent-of-Origin Effects on Honey Bee Gene Expression. *G3 (Bethesda,*  
349 *Md.)* ISSN 2160-1836. (doi:10.1534/g3.115.017814).
- 350 [19] Sadd, B. M., Barribeau, S. M., Bloch, G., Graaf, D. C. d., Dearden, P., Elsie, C. G., Gadau,  
351 J., Grimmelikhuijzen, C. J., Hasselmann, M., Lozier, J. D. *et al.*, 2015 The genomes of two  
352 key bumblebee species with primitive eusocial organization. *Genome Biology* **16**, 76. ISSN  
353 1465-6906. (doi:10.1186/s13059-015-0623-3).
- 354 [20] Harris, R. A., Wang, T., Coarfa, C., Nagarajan, R. P., Hong, C., Downey, S. L., Johnson,  
355 B. E., Fouse, S. D., Delaney, A., Zhao, Y. *et al.*, 2010 Comparison of sequencing-based  
356 methods to profile DNA methylation and identification of monoallelic epigenetic modifica-  
357 tions. *Nature biotechnology* **28**, 1097–1105. ISSN 1546-1696. (doi:10.1038/nbt.1682).
- 358 [21] Harrison, M. C., Hammond, R. L. & Mallon, E. B., 2015 Reproductive workers show queen-  
359 like gene expression in an intermediately eusocial insect, the buff-tailed bumble bee *Bombus*  
360 *terrestris*. *Molecular Ecology* **24**, 121–129. ISSN 1365-294X. (doi:10.1111/mec.13215).
- 361 [22] Riddell, C. E., Garces, J. D. L., Adams, S., Barribeau, S. M., Twell, D. & Mallon, E. B.,  
362 2014 Differential gene expression and alternative splicing in insect immune specificity. *BMC*  
363 *Genomics* **15**, 1031. ISSN 1471-2164. (doi:10.1186/1471-2164-15-1031).
- 364 [23] Kelley, K., Miller, K. R., Todd, A., Kelley, A., Tuttle, R. & Berberich, S. J., 2010 YPEL3, a  
365 p53-regulated gene that induces cellular senescence. *Cancer research* **70**, 3566–3575. ISSN  
366 0008-5472. (doi:10.1158/0008-5472.CAN-09-3219).

- 367 [24] Rothberg, J. M., Jacobs, J. R., Goodman, C. S. & Artavanis-Tsakonas, S., 1990 slit: an  
368 extracellular protein necessary for development of midline glia and commissural axon path-  
369 ways contains both EGF and LRR domains. *Genes & Development* **4**, 2169–2187. ISSN  
370 0890-9369, 1549-5477. (doi:10.1101/gad.4.12a.2169).
- 371 [25] Zheng, D., Liu, B.-B., Liu, Y.-K., Kang, X.-N., Sun, L., Guo, K., Sun, R.-X., Chen, J. &  
372 Zhao, Y., 2009 Analysis of the expression of Slit/Robo genes and the methylation status  
373 of their promoters in the hepatocellular carcinoma cell lines. *Zhonghua Gan Zang Bing Za*  
374 *Zhi = Zhonghua Ganzangbing Zazhi = Chinese Journal of Hepatology* **17**, 198–202. ISSN  
375 1007-3418.
- 376 [26] Leszczyniecka, M., Bhatia, U., Cueto, M., Nirmala, N. R., Towbin, H., Vattay, A., Wang,  
377 B., Zabludoff, S. & Phillips, P. E., 2006 MAP1d, a novel methionine aminopeptidase family  
378 member is overexpressed in colon cancer. *Oncogene* **25**, 3471–3478. ISSN 0950-9232. (doi:  
379 10.1038/sj.onc.1209383).
- 380 [27] Magnani, R., Dirk, L. M. A., Trievel, R. C. & Houtz, R. L., 2010 Calmodulin methyltrans-  
381 ferase is an evolutionarily conserved enzyme that trimethylates Lys-115 in calmodulin.  
382 *Nature Communications* **1**, 43. (doi:10.1038/ncomms1044).
- 383 [28] Takeuchi, H., Paul, R. K., Matsuzaka, E. & Kubo, T., 2007 EcR-A expression in the brain  
384 and ovary of the honeybee (*Apis mellifera* L.). *Zoological Science* **24**, 596–603. ISSN  
385 0289-0003. (doi:10.2108/zsj.24.596).
- 386 [29] Cardoen, D., Wenseleers, T., Ernst, U. R., Danneels, E. L., Laget, D., DE Graaf, D. C.,  
387 Schoofs, L. & Verleyen, P., 2011 Genome-wide analysis of alternative reproductive phe-  
388 notypes in honeybee workers. *Molecular Ecology* **20**, 4070–4084. ISSN 1365-294X. (doi:  
389 10.1111/j.1365-294X.2011.05254.x).
- 390 [30] Toth, A. L., Tooker, J. F., Radhakrishnan, S., Minard, R., Henshaw, M. T. & Grozinger,  
391 C. M., 2014 Shared genes related to aggression, rather than chemical communication, are

- 392 associated with reproductive dominance in paper wasps (*Polistes metricus*). *BMC Genomics*  
393 **15**, 75. ISSN 1471-2164. (doi:10.1186/1471-2164-15-75).
- 394 [31] Li, J., Wu, J., Begna Rundassa, D., Song, F., Zheng, A. & Fang, Y., 2010 Differential Pro-  
395 tein Expression in Honeybee (*Apis mellifera* L.) Larvae: Underlying Caste Differentiation.  
396 *PLoS ONE* **5**, e13455. (doi:10.1371/journal.pone.0013455).
- 397 [32] Markesich, D. C., Gajewski, K. M., Nazimiec, M. E. & Beckingham, K., 2000 bicaudal  
398 encodes the *Drosophila* beta NAC homolog, a component of the ribosomal translational  
399 machinery\*. *Development (Cambridge, England)* **127**, 559–572. ISSN 0950-1991.
- 400 [33] Scharf, M. E., Wu-Scharf, D., Pittendrigh, B. R. & Bennett, G. W., 2003 Caste and  
401 development-associated gene expression in a lower termite. *Genome Biology* **4**, R62. ISSN  
402 1465-6906. (doi:10.1186/gb-2003-4-10-r62).
- 403 [34] Drewell, R. A., Bush, E. C., Remnant, E. J., Wong, G. T., Beeler, S. M., Stringham, J. L.,  
404 Lim, J. & Oldroyd, B. P., 2014 The dynamic DNA methylation cycle from egg to sperm in  
405 the honey bee *Apis mellifera*. *Development* **141**, 2702–2711. ISSN 0950-1991, 1477-9129.  
406 (doi:10.1242/dev.110163).
- 407 [35] Glastad, K. M., Hunt, B. G. & Goodisman, M. A., 2014 Evolutionary insights into DNA  
408 methylation in insects. *Current Opinion in Insect Science* **1**, 25–30. ISSN 2214-5745.  
409 (doi:10.1016/j.cois.2014.04.001).
- 410 [36] Yan, H., Bonasio, R., Simola, D. F., Liebig, J., Berger, S. L. & Reinberg, D.,  
411 2015 DNA Methylation in Social Insects: How Epigenetics Can Control Behavior and  
412 Longevity. *Annual Review of Entomology* **60**, 435–452. ISSN 0066-4170. (doi:10.1146/  
413 annurev-ento-010814-020803).
- 414 [37] Dean, W., Bowden, L., Aitchison, A., Klose, J., Moore, T., Meneses, J. J., Reik, W. & Feil,  
415 R., 1998 Altered imprinted gene methylation and expression in completely ES cell-derived

- 416 mouse fetuses: association with aberrant phenotypes. *Development (Cambridge, England)*  
417 **125**, 2273–2282. ISSN 0950-1991.
- 418 [38] Pardo-Manuel de Villena, F., de la Casa-Espern, E. & Sapienza, C., 2000 Natural selection  
419 and the function of genome imprinting: beyond the silenced minority. *Trends in genetics:*  
420 *TIG* **16**, 573–579. ISSN 0168-9525.
- 421 [39] Onyango, P., Jiang, S., Uejima, H., Shablott, M. J., Gearhart, J. D., Cui, H. & Feinberg,  
422 A. P., 2002 Monoallelic expression and methylation of imprinted genes in human and mouse  
423 embryonic germ cell lineages. *Proceedings of the National Academy of Sciences of the United*  
424 *States of America* **99**, 10599–10604. ISSN 0027-8424. (doi:10.1073/pnas.152327599).
- 425 [40] Sapienza, C., 2002 Imprinted gene expression, transplantation medicine, and the other  
426 human embryonic stem cell. *Proceedings of the National Academy of Sciences of the United*  
427 *States of America* **99**, 10243–10245. ISSN 0027-8424. (doi:10.1073/pnas.172384299).
- 428 [41] Zhang, Y., Shields, T., Crenshaw, T., Hao, Y., Moulton, T. & Tycko, B., 1993 Imprinting of  
429 human H19: allele-specific CpG methylation, loss of the active allele in Wilms tumor, and  
430 potential for somatic allele switching. *American Journal of Human Genetics* **53**, 113–124.  
431 ISSN 0002-9297.
- 432 [42] Pignatta, D., Erdmann, R. M., Scheer, E., Picard, C. L., Bell, G. W. & Gehring, M.,  
433 2014 Natural epigenetic polymorphisms lead to intraspecific variation in Arabidopsis gene  
434 imprinting. *eLife* **3**, e03198. ISSN 2050-084X. (doi:10.7554/eLife.03198).
- 435 [43] Remnant, E. J., Ashe, A., Young, P. E., Buchmann, G., Beekman, M., Allsopp, M. H.,  
436 Suter, C. M., Drewell, R. A. & Oldroyd, B. P., 2016 Parent-of-origin effects on genome-  
437 wide DNA methylation in the Cape honey bee (*Apis mellifera capensis*) may be con-  
438 founded by allele-specific methylation. *BMC Genomics* **17**. ISSN 1471-2164. (doi:  
439 10.1186/s12864-016-2506-8).

- 440 [44] Edsgard, D., Iglesias, M. J., Reilly, S.-J., Hamsten, A., Tornvall, P., Odeberg, J. &  
441 Emanuelsson, O., 2016 GeneiASE: Detection of condition-dependent and static allele-  
442 specific expression from RNA-seq data without haplotype information. *Scientific Reports*  
443 **6**, 21134. ISSN 2045-2322. (doi:10.1038/srep21134).
- 444 [45] Wang, X., Werren, J. H. & Clark, A. G., 2016 Allele-Specific Transcriptome and Methylome  
445 Analysis Reveals Stable Inheritance and Cis -Regulation of DNA Methylation in *Nasonia*.  
446 *PLOS Biol* **14**, e1002500. ISSN 1545-7885. (doi:10.1371/journal.pbio.1002500).
- 447 [46] Wedd, L., Kucharski, R. & Maleszka, R., 2016 Differentially methylated obligatory epi-  
448 alleles modulate context-dependent LAM gene expression in the honeybee *Apis mellifera*.  
449 *Epigenetics* **11**, 1–10. ISSN 1559-2308. (doi:10.1080/15592294.2015.1107695).
- 450 [47] Kim, D., Pertea, G., Trapnell, C., Pimentel, H., Kelley, R. & Salzberg, S. L., 2013 TopHat2:  
451 accurate alignment of transcriptomes in the presence of insertions, deletions and gene fu-  
452 sions. *Genome Biology* **14**, R36. ISSN 1465-6906. (doi:10.1186/gb-2013-14-4-r36).
- 453 [48] Li, H., Handsaker, B., Wysoker, A., Fennell, T., Ruan, J., Homer, N., Marth, G., Abecasis,  
454 G., Durbin, R. & 1000 Genome Project Data Processing Subgroup, 2009 The Sequence  
455 Alignment/Map format and SAMtools. *Bioinformatics (Oxford, England)* **25**, 2078–2079.  
456 ISSN 1367-4811. (doi:10.1093/bioinformatics/btp352).
- 457 [49] Li, H. & Durbin, R., 2009 Fast and accurate short read alignment with Burrows-Wheeler  
458 transform. *Bioinformatics (Oxford, England)* **25**, 1754–1760. ISSN 1367-4811. (doi:10.  
459 1093/bioinformatics/btp324).
- 460 [50] DePristo, M. A., Banks, E., Poplin, R., Garimella, K. V., Maguire, J. R., Hartl, C., Philip-  
461 pakis, A. A., del Angel, G., Rivas, M. A., Hanna, M. *et al.*, 2011 A framework for variation  
462 discovery and genotyping using next-generation DNA sequencing data. *Nature Genetics*  
463 **43**, 491–498. ISSN 1061-4036. (doi:10.1038/ng.806).



- 464 [51] McKenna, A., Hanna, M., Banks, E., Sivachenko, A., Cibulskis, K., Kernytsky, A.,  
465 Garimella, K., Altshuler, D., Gabriel, S., Daly, M. *et al.*, 2010 The Genome Analysis  
466 Toolkit: A MapReduce framework for analyzing next-generation DNA sequencing data.  
467 *Genome Research* **20**, 1297–1303. ISSN 1088-9051, 1549-5469. (doi:10.1101/gr.107524.110).
- 468 [52] Danecek, P., Auton, A., Abecasis, G., Albers, C. A., Banks, E., DePristo, M. A., Hand-  
469 saker, R. E., Lunter, G., Marth, G. T., Sherry, S. T. *et al.*, 2011 The variant call for-  
470 mat and VCFtools. *Bioinformatics* **27**, 2156–2158. ISSN 1367-4803, 1460-2059. (doi:  
471 10.1093/bioinformatics/btr330).
- 472 [53] Takai, D. & Jones, P. A., 2002 Comprehensive analysis of CpG islands in human chromo-  
473 somes 21 and 22. *Proceedings of the National Academy of Sciences* **99**, 3740–3745. ISSN  
474 0027-8424, 1091-6490. (doi:10.1073/pnas.052410099).
- 475 [54] Leek, J. T., Johnson, W. E., Parker, H. S., Jaffe, A. E. & Storey, J. D., 2012 The sva package  
476 for removing batch effects and other unwanted variation in high-throughput experiments.  
477 *Bioinformatics* **28**, 882–883. ISSN 1367-4803, 1460-2059. (doi:10.1093/bioinformatics/  
478 bts034).
- 479 [55] Johnson, W. E., Li, C. & Rabinovic, A., 2007 Adjusting batch effects in microarray ex-  
480 pression data using empirical Bayes methods. *Biostatistics* **8**, 118–127. ISSN 1465-4644,  
481 1468-4357. (doi:10.1093/biostatistics/kxj037).
- 482 [56] McCarthy, D. J., Chen, Y. & Smyth, G. K., 2012 Differential expression analysis of multi-  
483 factor RNA-Seq experiments with respect to biological variation. *Nucleic Acids Research*  
484 **40**, 4288–4297.
- 485 [57] Robinson, M. D., McCarthy, D. J. & Smyth, G. K., 2010 edgeR: a Bioconductor package for  
486 differential expression analysis of digital gene expression data. *Bioinformatics* **26**, 139–140.  
487 ISSN 1367-4803, 1460-2059. (doi:10.1093/bioinformatics/btp616).

- 488 [58] Quinlan, A. R. & Hall, I. M., 2010 BEDTools: a flexible suite of utilities for comparing  
489 genomic features. *Bioinformatics (Oxford, England)* **26**, 841–842. ISSN 1367-4811. (doi:  
490 10.1093/bioinformatics/btq033).
- 491 [59] Harvey, C. T., Moyerbrailean, G. A., Davis, G. O., Wen, X., Luca, F. & Pique-Regi, R.,  
492 2014 QuASAR: Quantitative Allele Specific Analysis of Reads. *Bioinformatics* p. btu802.  
493 ISSN 1367-4803, 1460-2059. (doi:10.1093/bioinformatics/btu802).
- 494 [60] Altschul, S. F., Madden, T. L., Schaffer, A. A., Zhang, J. H., Zhang, Z., Miller, W. &  
495 Lipman, D. J., 1997 Gapped BLAST and PSI-BLAST: a new generation of protein database  
496 search programs. *Nucleic Acids Research* **25**, 3389–3402. ISSN 0305-1048. 17.
- 497 [61] Gotz, S., Garca-Gmez, J. M., Terol, J., Williams, T. D., Nagaraj, S. H., Nueda, M. J.,  
498 Robles, M., Taln, M., Dopazo, J. & Conesa, A., 2008 High-throughput functional annotation  
499 and data mining with the Blast2go suite. *Nucleic Acids Research* **36**, 3420–3435. ISSN  
500 0305-1048, 1362-4962. (doi:10.1093/nar/gkn176).
- 501 [62] Supek, F., Bonjak, M., kunca, N. & muc, T., 2011 REVIGO Summarizes and Visualizes  
502 Long Lists of Gene Ontology Terms. *PLoS ONE* **6**, e21800. (doi:10.1371/journal.pone.  
503 0021800).
- 504 [63] Gineikiene, E., Stoskus, M. & Griskevicius, L., 2009 Single Nucleotide Polymorphism-Based  
505 System Improves the Applicability of Quantitative PCR for Chimerism Monitoring. *The*  
506 *Journal of Molecular Diagnostics : JMD* **11**, 66–74. ISSN 1525-1578. (doi:10.2353/jmoldx.  
507 2009.080039).
- 508 [64] Pfaffl, M. W., 2001 A new mathematical model for relative quantification in real-time  
509 RTPCR. *Nucleic Acids Research* **29**, e45–e45. ISSN 0305-1048, 1362-4962. (doi:10.1093/  
510 nar/29.9.e45).
- 511 [65] Liu, W. & Saint, D. A., 2002 A New Quantitative Method of Real Time Reverse Transcrip-  
512 tion Polymerase Chain Reaction Assay Based on Simulation of Polymerase Chain Reaction

513 Kinetics. *Analytical Biochemistry* **302**, 52–59. ISSN 0003-2697. (doi:10.1006/abio.2001.  
514 5530).

515 [66] Team, R.-C., 2015. R: A language and environment for statistical computing.

Submitted to BMC Evolutionary Biology

## 516 **Figure and table legends**

517 **Table 1. The eleven of the nineteen monoallelically methylated and expressed**  
518 **genes that returned informative blast hits.**

519 **Figure 1. Coverage of three libraries for bicaudal d.** Horizontal lines represent available  
520 reads for each library over this genomic range (x-axis). The vertical line shows the position  
521 of the snp and which genomic library shares the same allele.

522 **Figure 2. GO terms associated with allele specific expression.** A summary of the  
523 enriched GO terms (p <0.05, based on Blast2Go annotation) found for genes displaying  
524 allele specific expression. This figure was produced using Revigo

525 **Table 2. Bees used in each experiment.** K refers to Koppert, A to Agralan and Q to the  
526 wild caught Leicester queen.

## 527 **Supporting information legends**

528 **Table S1. Nineteen genes showing both monoallelic methylation and monoallelic**  
529 **expression.** Blast results and genomic coordinates of the reads from the RNA-seq, MRE-  
530 seq and MeDip-seq libraries.

531 **Table S2. Confirmation of single allele expression of nineteen monoallelically ex-**  
532 **pressed genes in twenty-nine previously published transcriptomes.** For each of  
533 the 19 contigs are the previously published RNA-seq libraries with associated read counts.

534 **Table S3. 555 genes showing allele specific expression in at least three of the**  
535 **29 previously published RNA-seq libraries.** This table details the blast results  
536 from both the bumblebee and drosophila genomes and the GO terms associated with the  
537 drosophila hits.

538 **Figure S1. Biological coefficient of variation (BCV) of a) raw data, and b) SVA-**  
539 **adjusted data for the 29 RNA-seq *Bombus terrestris* libraries**

Submitted to BMC Evolutionary Biology
